# Supplementary material for: Characterization of 15 Earthworm Mitogenomes from Northeast China and Its Phylogenetic Implication (Oligochaeta: Lumbricidae, Moniligastridae)
Source: MDPI journal article supplement (doi:10.3390/d14090714), 2022-08-28
Supplement: s1 [file s1]

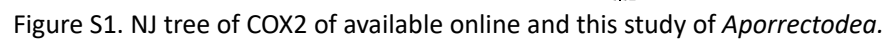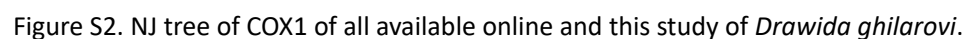

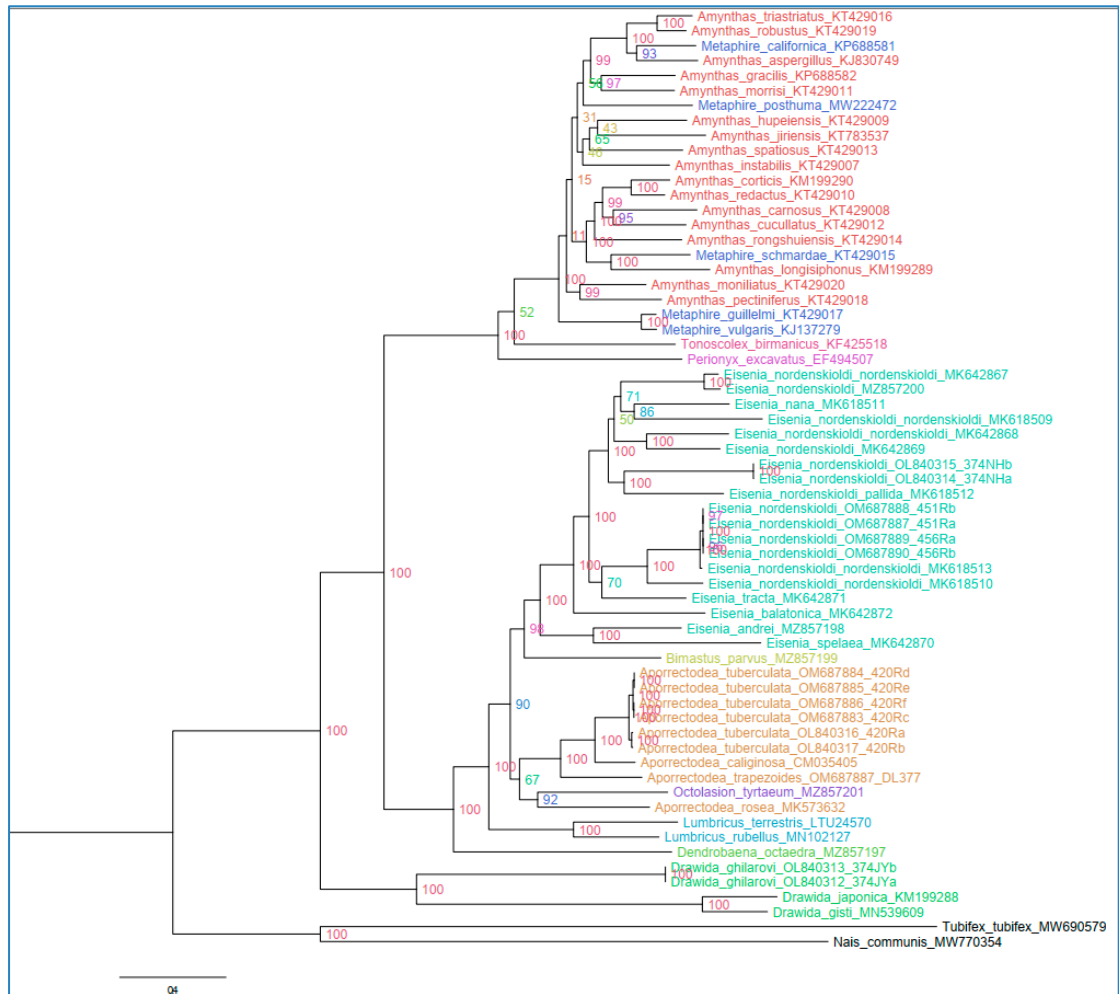

Figure S3. ML tree of PCG dataset.

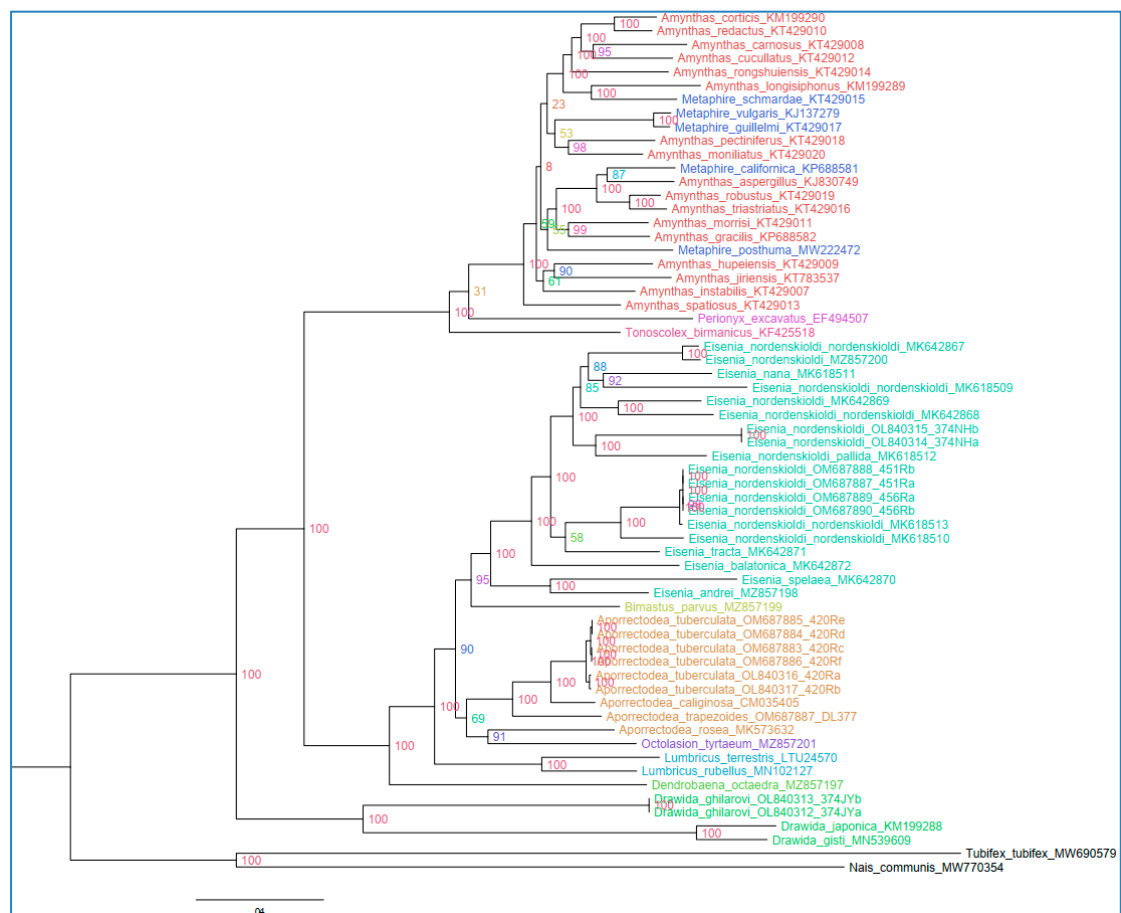

Figure S4. ML tree of PCGrRNA dataset.

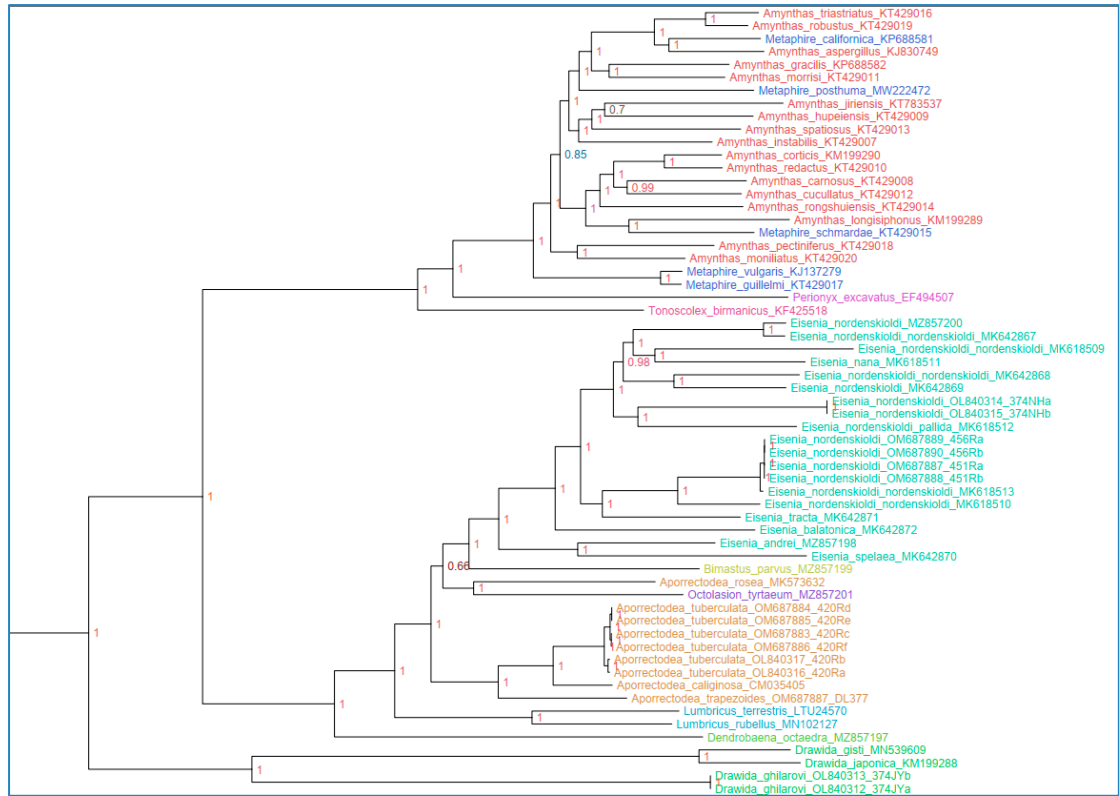

Figure S5. BI tree of PCG dataset.

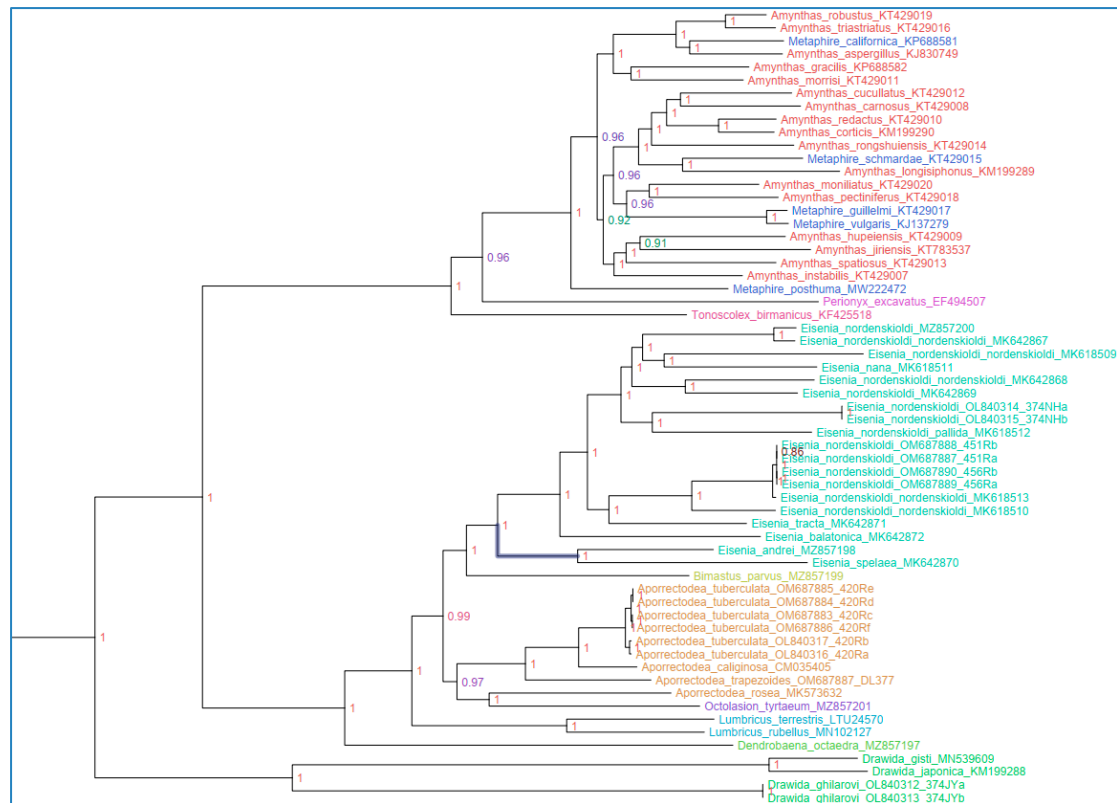

Figure S6. BI tree of PCGrRNA dataset.
